# Supplementary material
Source: PubMed Central journal article supplement (PMC2911290)
Supplement: supp_M109.096925_jbc.M109.096925-1.pdf [file supp_M109.096925_jbc.M109.096925-1.pdf]

**Supplementary figure 1.** Protein sequence alignments of IFN $\gamma$ rel (A) and IFN $\gamma$  (B). Sequence alignments were performed using ClustalW. The signal sequences are in bold face, the IFN $\gamma$  signature sequences are highlighted in grey and indicated overhead and the nuclear localization signals (NLS) are bold face with the “NLS” overhead. Fully conserved residues are indicated by an asterisk (\*) below, partially conserved and semi-conserved substitutions are represented by “:” and “.”, respectively. The GenBank accession numbers for the sequences used are: carp IFN $\gamma$ rel, **AM261214**; catfish IFN $\gamma$ rel, **DQ124249**; goldfish IFN $\gamma$ rel, **GQ149696**; zebrafish IFN $\gamma$ rel, **AB194272**; carp IFN $\gamma$ a, **AM168523**; carp IFN $\gamma$ b, **AM168524**; catfish IFN $\gamma$ a, **DQ124250**; catfish IFN $\gamma$ b, **DQ124251**; chicken IFN $\gamma$ , **X99774**; goldfish IFN $\gamma$ , **EU909368**; mouse IFN $\gamma$ , **ACR22511**; xenopus IFN $\gamma$ , **ABU54059**; zebrafish IFN $\gamma$ , **AB158361**.

# A

goldfish IFN $\gamma$ rel -MYCRLNMVYLICALLLIVSLQQTVGARLPQSQKDKQMLKNVREKIESLQKHHTTCTE 59  
carp IFN $\gamma$ rel -MYCWLNMVHLICALLLIVSLQQTVGARLPQSQNDKEQMLKNLREKIEPLQKHHTTCKE 59  
zebrafish IFN $\gamma$ rel -MDSCLKMY-LLCGLLWIASLQTTSAFRFRSRSEN-PILN---TNIKELKHTYNTLAKD 54  
catfish IFN $\gamma$ rel -MGSWSNVL-LMCGLVVMALLNGTTGHEIHN-----LT---EAVHTLQIHGGLTDTK 47  
xenopus IFN $\gamma$ rel --MRQYRLLSLFV IYVWGHIGHSSVNI REAS-----TATEELRKHFPNKINQD 46  
chicken IFN $\gamma$ rel MTCQTYNLFVLSVIMIIYGHGTASSLNLVQLQD-----DIDKLDKADFNSSHSD 47  
mouse IFN $\gamma$ rel ---MNATHCILALQLFLMAVSGCYCHGTVIES-----LESLNNYFNSSGID 43

goldfish IFN $\gamma$ rel WFPGKSVLSSHLHQLNSKASCTCQSLLLDSMLNITETIFQDMRGAENEETKTRLDVMT 119  
carp IFN $\gamma$ rel WFPGKSVLSSHLHQLNSKASCTCQSLLLDRMLNITETILQDLRGAENEETKTRLDVMT 119  
zebrafish IFN $\gamma$ rel WFPGKSVFVSHLDQLNSKPTCTCQAVLLEGLMSIYEDIFQDMMNKSDNKEVRDDLKVIHE 114  
catfish IFN $\gamma$ rel WVGKAVFTPYLQKVED--TCTCEKLVLLRMLNGYMDIFSDMLKAKTVEETETSLKELQES 105  
xenopus IFN $\gamma$ rel DD-DSTGLIFLKLFDWSWKEEKEKILLSQIVPVYKMLDAIPKIPLOASIKNLKMLLHT 105  
chicken IFN $\gamma$ rel VA--DGGPIIVEKLNWTERNEKRIILSQIVSMYLEMLENTDK-----SKPHIKHISEE 99  
mouse IFN $\gamma$ rel VE---EKSLFLDIRNWQKDGDMKILQSQIISFVLRLEFVLKD-----NQAISNNISVIE 95

goldfish IFN $\gamma$ rel VKMLRHKYSEEQKVVRELQDIHSVEVNNKIQKALNSFLILYDLY----- 166  
carp IFN $\gamma$ rel VKILRHKYSEEQKVVRELQDIHSVEVKNGTNQKALNSFLILYDLY----- 166  
zebrafish IFN $\gamma$ rel VKNLKHKNYNEEHLWRELQDIHSVKAKNGTIQERALNDFLKVYRRASTEKRHLHMS---- 170  
catfish IFN $\gamma$ rel VKELKNKNYNEQAVWQKLHEINTVKKDDSTIQGGAVNDFISVYDKAPVVAQHSKKTPLL 165  
xenopus IFN $\gamma$ rel S--PEDLLKQSDQKLRGLHELKKIQVGDVKTQHAAIKELFMILRELSVMEQPKNHVVKKR 163  
chicken IFN $\gamma$ rel LYTLKNNLPDGVKVKVIMDLAKLPMNDRIRKAAANELFSILQKLVDPSPFKRRRSQSQ 159  
mouse IFN $\gamma$ rel SHLITTFPNSKAKKDAFMSIAKFEVNNPQVQRQAFNELIRVHQLLPESLRRKRRSRC 155

goldfish IFN $\gamma$ rel -----  
carp IFN $\gamma$ rel -----  
zebrafish IFN $\gamma$ rel -----  
catfish IFN $\gamma$ rel -----  
xenopus IFN $\gamma$ rel KHFLQR----- 171  
chicken IFN $\gamma$ rel KLDQQRNRKRNRLF 179  
mouse IFN $\gamma$ rel RRCNC----- 164

## IFN $\gamma$ signature NLS

# B

goldfish IFN $\gamma$  MIAQNM TIFWGVCLLTSGWATYSEASVPENLDKSIDELKAYYIK---DDHEIHNAHPVF 57  
zebrafish IFN $\gamma$  MIAQNM GFAWGVCLLTSGWATYSEASVPENLDKSIDELKAYYIK---EDSQLHNAHPIF 57  
carp IFN $\gamma$  MTAQNTMAFFWGVCLLTSGWATYSEASVPENLDKSIDELKAYYIK---DDHELHNAHPVF 57  
carp IFN $\gamma$  MTAQNTMAFFWGVCLVLTGQMTYSEASVPENLDKSIDELKAYYIK---DDRELHNAHPVF 57  
catfish IFN $\gamma$  MTLFWRICFVFFGMMAYSEAFLPKNIKESIDHLNHHY---NPNPKLYDGHSLF 51  
catfish IFN $\gamma$  MTLFWRICFVFFGMMAYSEAFLPKNIKESIDHLNHHYVRKNPNPKLYDGHSLF 54  
chicken IFN $\gamma$  MTCQTYNLFVLSVIMIIYGHGTASSLNLV--QLQDDIDKLDKADFNSS--SHSDVADGGPII 55  
xenopus IFN $\gamma$ rel --MRQYRLLSLFV IYVWGHIGHSSVNI R-EASTATEELRKHFPNK--INQDDDDSTGLIF 55  
mouse IFN $\gamma$ rel -----MNATHCILALQLFLMAVSGCYCHGTVIESLESLNNYFNSS--SGIDVVEKSLIT 50

goldfish IFN $\gamma$  LRVLKDLKVNLEEPEQNLLMSIIMDYSRIFTRMENDSLDEATKERIAHVQEHKLLKEN 117  
zebrafish IFN $\gamma$  LRILKDLKVNLEEPEQNLLMSIIMDYSRIFTRMENDSVDEATKERLAHVQEHKLLQES 117  
carp IFN $\gamma$  LRALKDLKVNLEEPEQNLLMSIIMDYSRIFTRMENDSLDEATKERLAHVQEHKLLKEN 117  
carp IFN $\gamma$  LRFLKDIKVNLEEPEQNLLMSIIMDYSRIFTRMENDSQDEATKERLAHVQEHLEKLOEN 117  
catfish IFN $\gamma$  LDKLT--KQKFESEQKLLMTIILDAYNKIFTKMNENQDETAKNHLHEVKDQMNKLEH 109  
catfish IFN $\gamma$  LDKLT--KQKFESEQKLLMTIILDAYNKIFTKMNENQDETAKNHLHEVKDQMNKLEH 112  
chicken IFN $\gamma$  VEKLN---WTERNEKRIILSQIVSMYLEMLENTDK-----SKPHIKHISEELYTLKNN 106  
xenopus IFN $\gamma$ rel LKLFDS---WKEEKEKILLSQIVPVYKMLDAIPKIP---ELQASIKNLKMLLHTSPED 109  
mouse IFN $\gamma$ rel LDIWRN---WQKDGDMKILQSQIISFVLRLEFVLKD-----NQAISNNISVIESHLIT 100

goldfish IFN $\gamma$  YFPGKSAELKTYAETLWAIKEDDPVQKALFELKRVYREATLLKLNKKE-RRRRQAKN 176  
zebrafish IFN $\gamma$  YFPGKSAELRTYAETLWAIKENDPVIQKALFELKRVYREATLLKLNKKE-RKRRQAKA 176  
carp IFN $\gamma$  YFPGKSAELKTYAETLWAIKEDDPVQKALFELKRVYREATQLRNLKKE-RRRRQAKI 176  
carp IFN $\gamma$  YFPGKSAELKTYAETLWAIKEDDPVQKALFELKRVYREATQLKLNKKE-RRRRQARI 176  
catfish IFN $\gamma$  YFSGKHADIKKYVTELLDLKENDPRIQSKAIFELKAVYNKATNLGRMSAENPRRRQAKS 169  
catfish IFN $\gamma$  YFSGKHADIKKYVTELLDLKENDPRIQSKAIFELKAVYNKATNLGRMSAENPRRRQAKS 172  
chicken IFN $\gamma$  LPDG--VKKVKDIMDLAKLPMNDRIRKAAANELFSILQKLVDPSPFKRRRSQSQRRRCN 164  
xenopus IFN $\gamma$ rel LKQSDQKLRG-LHELKKIQVGDVKTQHAAIKELFMILRELSVMEQPKNHVVKKRDLFQ 168  
mouse IFN $\gamma$ rel TFFSNSKAKKDAFMSIAKFEVNNPQVQRQAFNELIRVHQLLP-----ESSLRRKRRSRC 155

## IFN $\gamma$ signature NLS

goldfish IFN $\gamma$  TKKQKS----- 182  
zebrafish IFN $\gamma$  TKKQKS----- 182  
carp IFN $\gamma$  SKKQHS----- 175  
carp IFN $\gamma$  SKKQHS----- 178  
catfish IFN $\gamma$  SKKQHS----- 178  
chicken IFN $\gamma$  -----  
xenopus IFN $\gamma$  QRRKRNRRLF 179  
mouse IFN $\gamma$  -----
