# Supplementary material
Source: PubMed Central journal article supplement (PMC2911290)
Supplement: supp_M109.096925_jbc.M109.096925-2.pdf [file supp_M109.096925_jbc.M109.096925-2.pdf]

**SUPPLEMENTARY TABLE 1**

List of primer sequences

| <b>PRIMER</b>                                          | <b>SEQUENCE (5'-3')</b>           |
|--------------------------------------------------------|-----------------------------------|
| <b>IRF-1 forward</b>                                   | CCG GAC ATC GAA GAG GTG AA        |
| <b>IRF-1 reverse</b>                                   | GGG CAG CAT GCG GTA GAC T         |
| <b>IRF-2 forward</b>                                   | AGA TTC CGT GGA TGC ATG CT        |
| <b>IRF-2 reverse</b>                                   | TGG CCC AGT TTC GGA AGA G         |
| <b>IRF-5 forward</b>                                   | ATG GCT GCT GGC ACA GAT TAA       |
| <b>IRF-5 reverse</b>                                   | TGG AAC AGT CTG CGC TCT TG        |
| <b>IRF-7 forward</b>                                   | GGC TGT GGT CAG TGG GAA GAT       |
| <b>IRF-7 reverse</b>                                   | AGC GCA CAA CGG AAA TTT GT        |
| <b>IRF-8 forward</b>                                   | CTG GAA ACA TGC GGG AAA AC        |
| <b>IRF-8 reverse</b>                                   | TTA AAT ATC GCC CAC GCT TTG       |
| <b>IRF-9 forward</b>                                   | GGC TTG GGC AGA GTT TAA AGG       |
| <b>IRF-9 reverse</b>                                   | AGC GAA GGC GAG TTT TCC A         |
| <b>Ceruloplasmin forward</b>                           | AAG GCA AAT TCA TTG GTT CGA       |
| <b>Ceruloplasmin reverse</b>                           | TGG GTT TGG TGA AGG TGT CA        |
| <b>CCL-1 forward</b>                                   | AAG GTC ACC GAA CCC ATC AG        |
| <b>CCL-1 reverse</b>                                   | TCG TCA CAT GAT GGC CTT CA        |
| <b>CXCL-8 forward</b>                                  | CTG AGA GTC GAC GCA TTG GAA       |
| <b>CXCL-8 reverse</b>                                  | TGG TGT CTT TAC AGT GTG AGT TTG G |
| <b>EF-1<math>\alpha</math> forward</b>                 | CCG TTG AGA TGC ACC ATG AGT       |
| <b>EF-1<math>\alpha</math> reverse</b>                 | TTG ACA GAC ACG TTC TTC ACG TT    |
| <b>gp91<sup>phox</sup> forward</b>                     | CCC ATC ACC TGT TCA TCG TCT T     |
| <b>gp91<sup>phox</sup> reverse</b>                     | TAG TCT GGC CTC GCA CGA TA        |
| <b>IFN<math>\gamma</math>rel forward</b>               | TGT CGG AGC CAG ACT TCC A         |
| <b>IFN<math>\gamma</math>rel reverse</b>               | GAC TCG ATT TTT TCT CGT ACG TTC T |
| <b>IFNGR1-1 forward</b>                                | TTT TAC GAC TGC CCA CAT GCT       |
| <b>IFNGR1-1 reverse</b>                                | GGG TCC GTA ACT ATC TAC CGT ATC T |
| <b>IFNGR1-2 forward</b>                                | CAG TAA CCC AAC TGA ACA GAC GAA   |
| <b>IFNGR1-2 reverse</b>                                | CAC TGT TTG GGA AGG ACT TTC AT    |
| <b>IL-1<math>\beta</math>-1 forward</b>                | GCG CTG CTC AAC TTC ATC TTG       |
| <b>IL-1<math>\beta</math>-1 reverse</b>                | GTG ACA CAT TAA GCG GCT TCA C     |
| <b>IL-1<math>\beta</math>-2 forward</b>                | GAT GCG CTG CTC AGC TTC T         |
| <b>IL-1<math>\beta</math>-2 reverse</b>                | AGT GGG TGC TAC ATT AAC CAT ACG   |
| <b>p22<sup>phox</sup> forward</b>                      | TGG ACC CCT GAC CAG AAA CT        |
| <b>p22<sup>phox</sup> reverse</b>                      | AAC ATG AAC CCC CCT GGA A         |
| <b>p40<sup>phox</sup> forward</b>                      | TCC AAG AGC GGG AAT CAT G         |
| <b>p40<sup>phox</sup> reverse</b>                      | GTC GAT GCC CTC TGG CTG TA        |
| <b>p47<sup>phox</sup> forward</b>                      | CCA GGA ATG GGA CAC GAT CT        |
| <b>p47<sup>phox</sup> reverse</b>                      | GAG GAG AGC CTG AGT TTG CAA       |
| <b>p67<sup>phox</sup> forward</b>                      | TGC CTG GCA ACA TTG TCT TC        |
| <b>p67<sup>phox</sup> reverse</b>                      | CCC GCT TCT CAT TGA AAA CAA       |
| <b>Sumo goldfish IFN<math>\gamma</math>rel forward</b> | AGC GTC CCT GAG AAC CTG GAC AAG   |
| <b>Sumo goldfish IFN<math>\gamma</math>rel reverse</b> | TTA AGA CTT TAG ATT TTT GGT GTT   |
| <b>SUMO forward</b>                                    | AGA TTC TTG TAC GAC GG T ATT AG   |
| <b>TGF<math>\beta</math> forward</b>                   | GTA CAC TAC GGC GGA GGA TTG       |
| <b>TGF<math>\beta</math> reverse</b>                   | CGC TTC GAT TCG CTT TCT CT        |
| <b>TNF<math>\alpha</math>-1 forward</b>                | CAT TCC TAC GGA TGG CAT TTA CTT   |
| <b>TNF<math>\alpha</math>-1 reverse</b>                | CCT CAG GAA TGT CAG TCT TGC AT    |
| <b>TNF<math>\alpha</math>-2 forward</b>                | TCA TTC CTT ACG ACG GCA TTT       |
| <b>TNF<math>\alpha</math>-2 reverse</b>                | CAG TCA CGT CAG CCT TGC AG        |
| <b>T7 reverse</b>                                      | TAG TTA TTG CTC AGC GGT GG        |
